# Supplementary material for: Anti-Inflammatory Effects of Jakyakgamcho-Tang in IL-4- and TNF-α-Stimulated Lung Epithelial Cells and Lipopolysaccharide-Stimulated Macrophages
Source: MDPI journal article supplement (doi:10.3390/app112210569), 2021-11-10

Supplementary material

Figure S1. Comparison of mass spectrum of reference standards and JGTW constituents

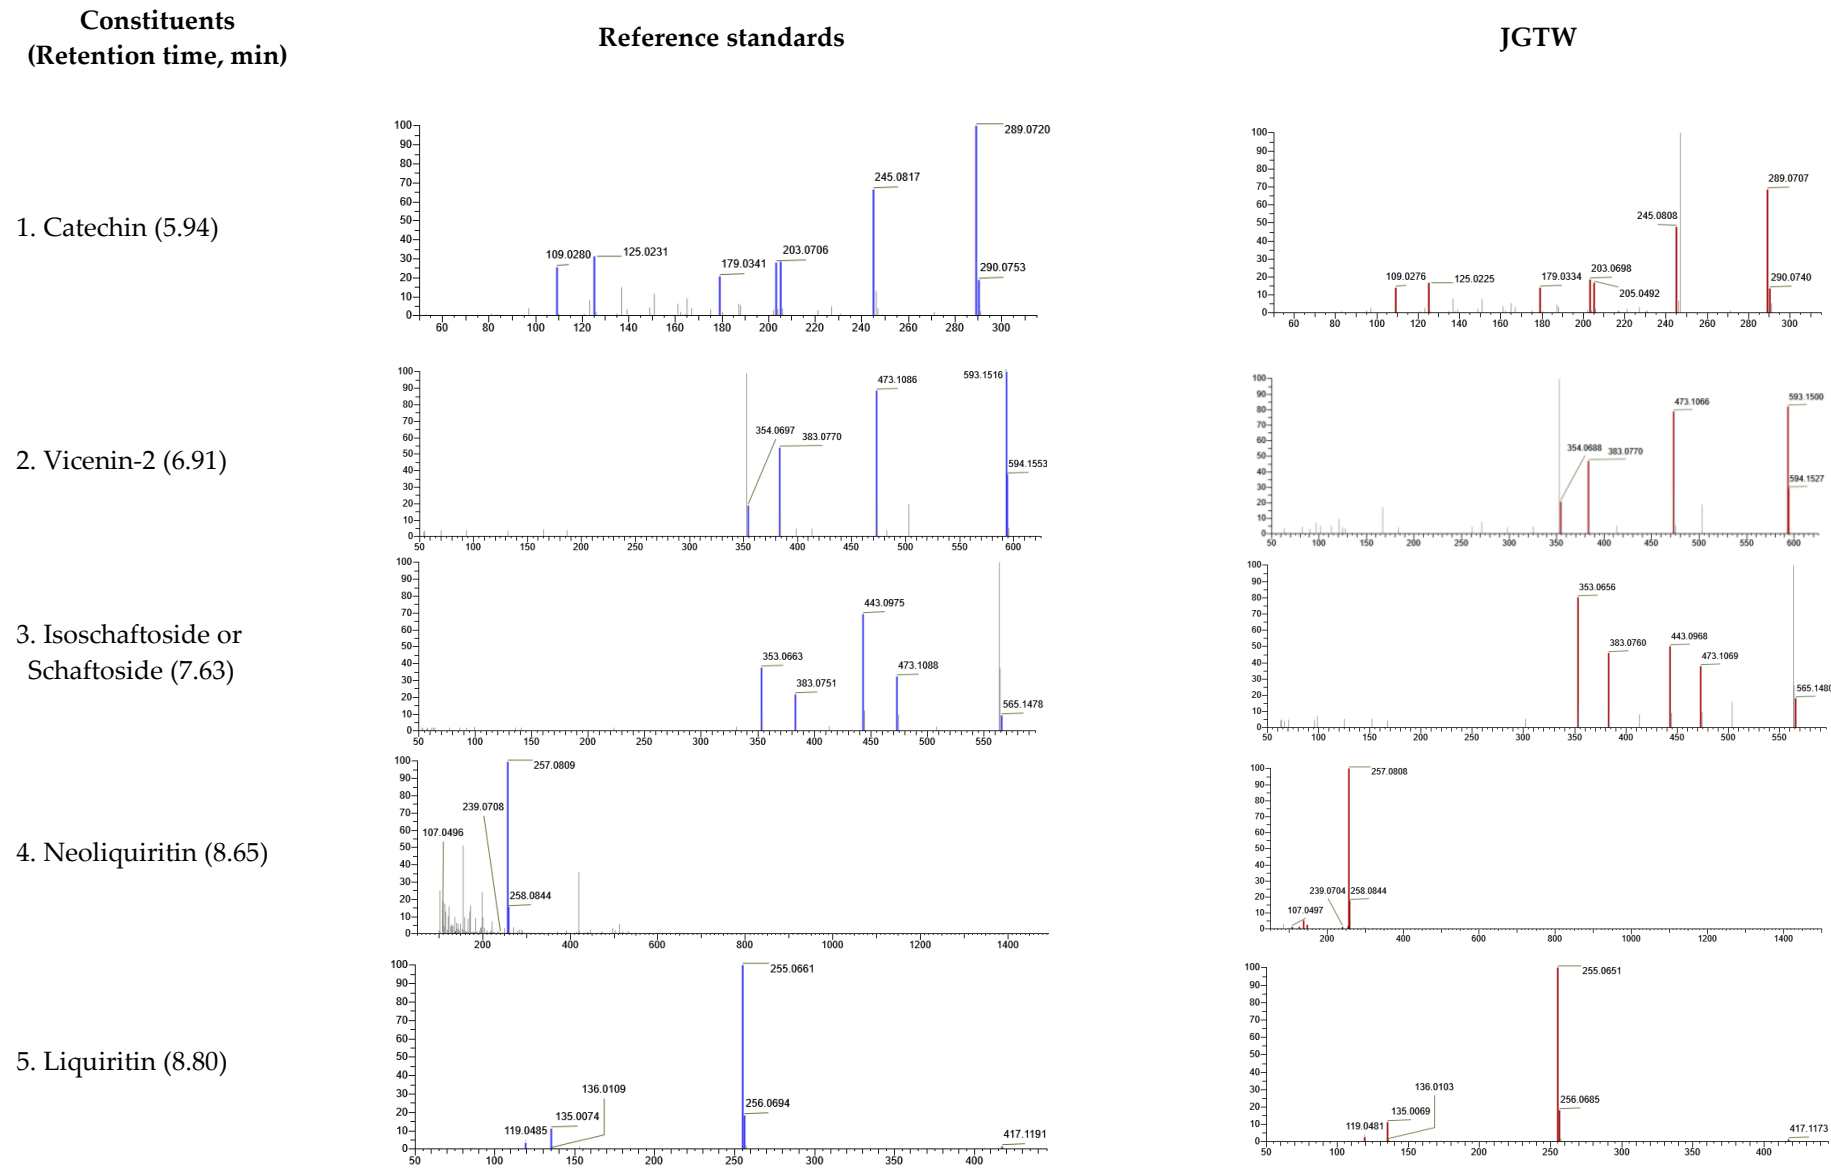

6. Taxifolin (8.93)

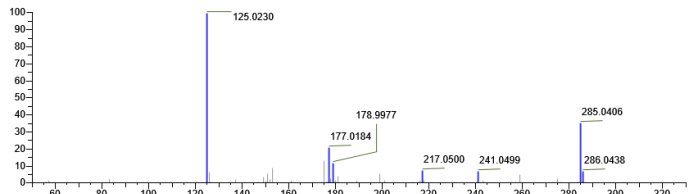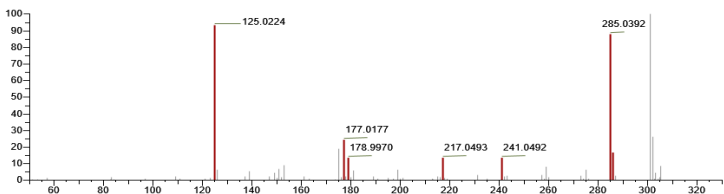

7. Liquiritigenin (11.92)

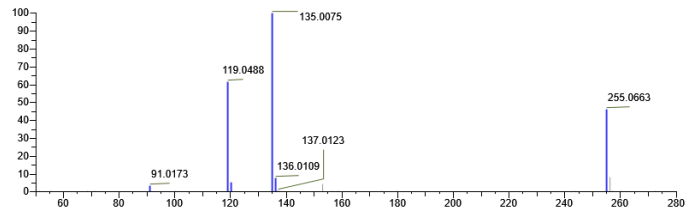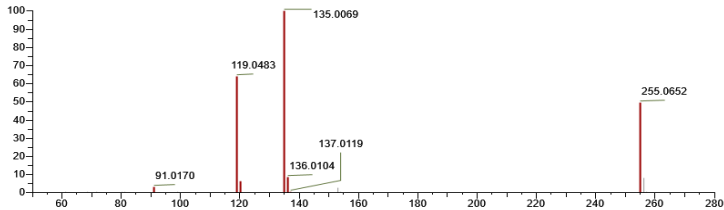

8. Luteolin (12.29)

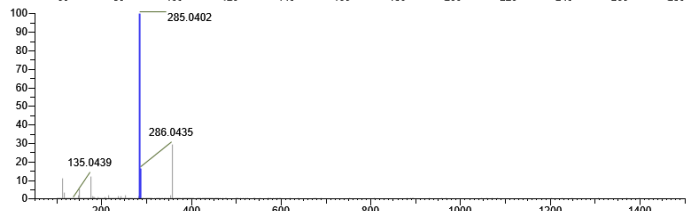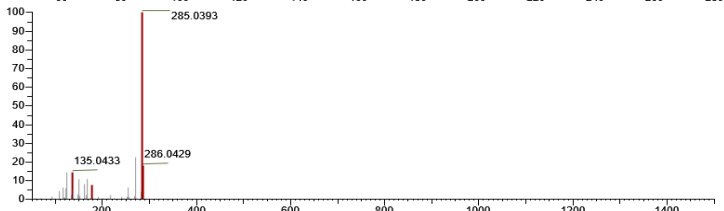

9. Calycosin (12.53)

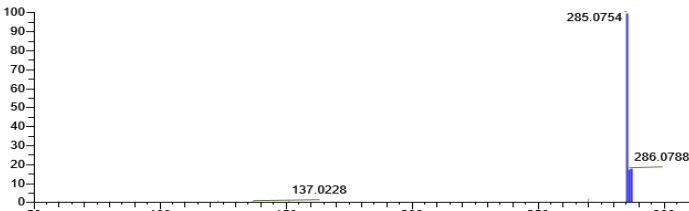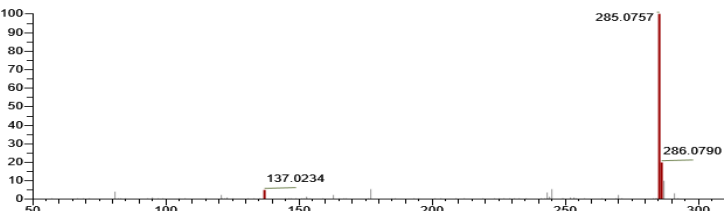

10. Naringenin (13.91)

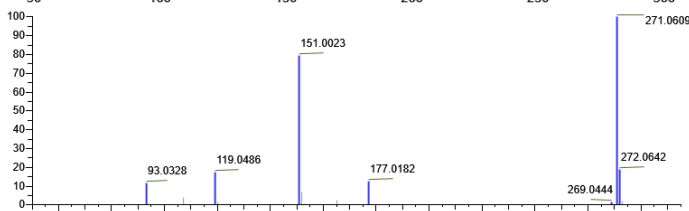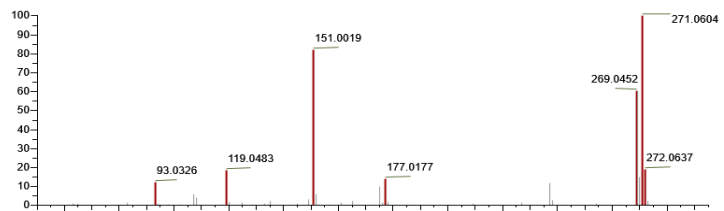

11. Kaempferol (14.23)

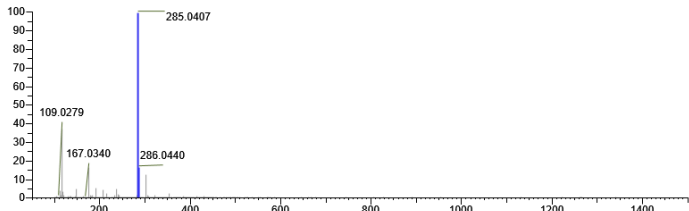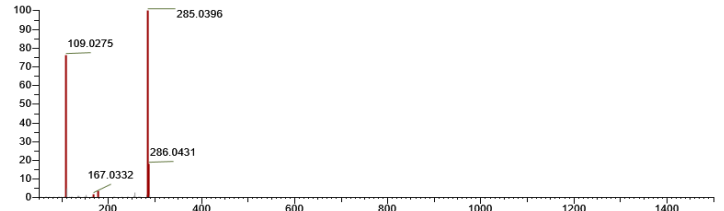

12. Formononetin  
(16.28)

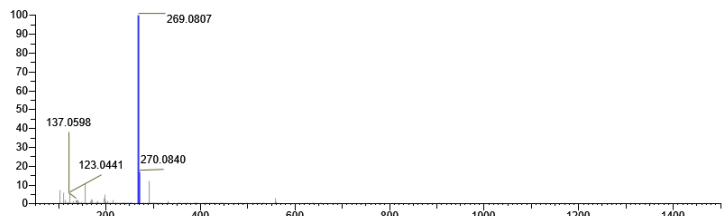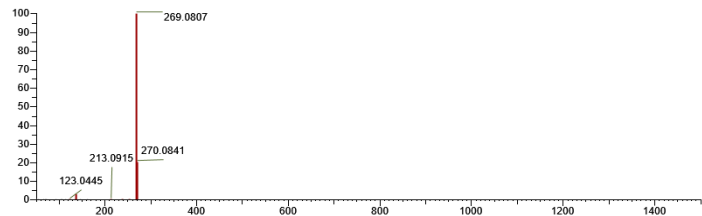

13. Licochalcone B  
(11.67)

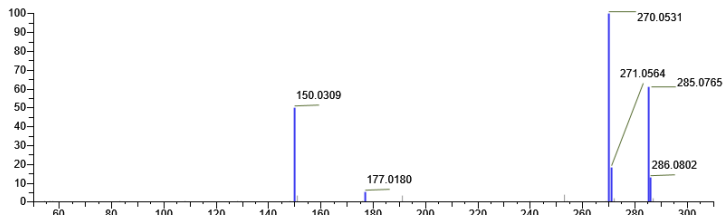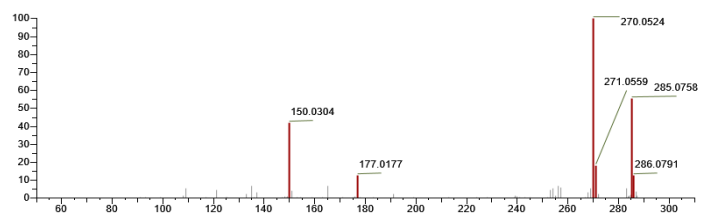

14. Echinatin (13.95)

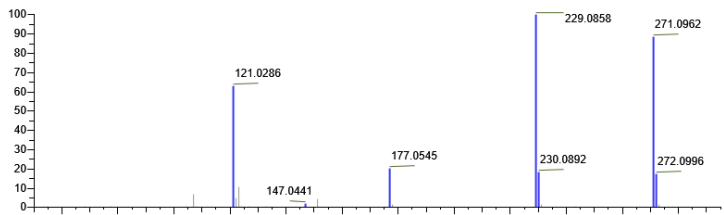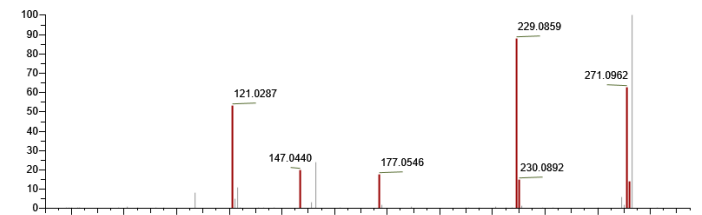

15. Isoliquiritigenin  
(15.67)

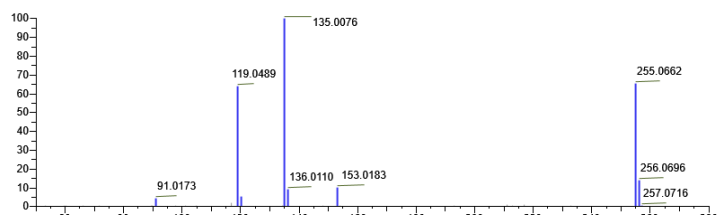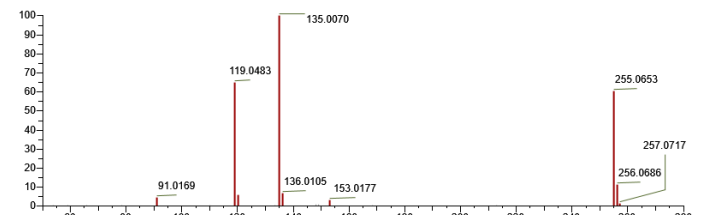

16. Albiflorin (7.51)

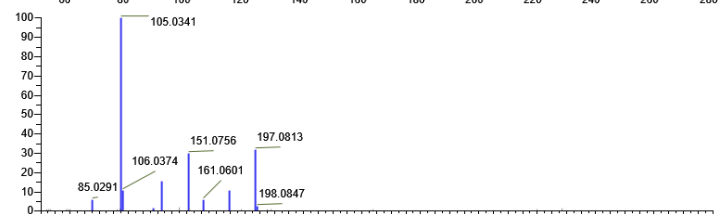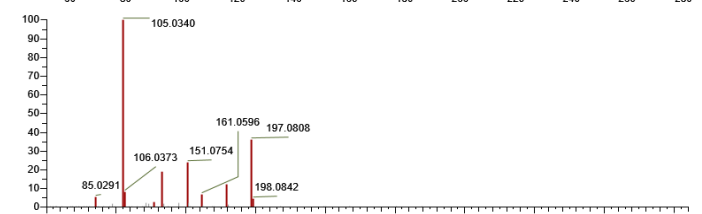

17. Paeoniflorin (7.95)

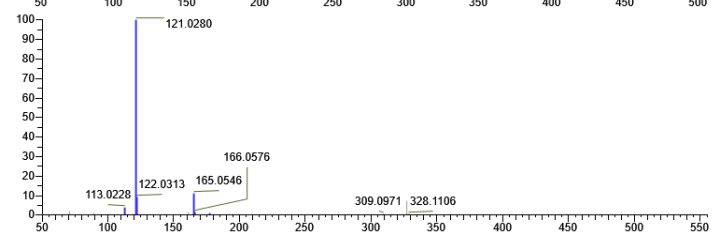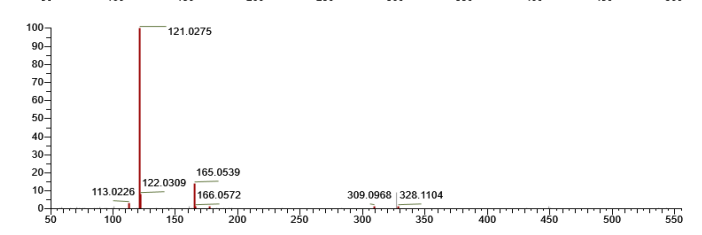

18. Mudanpioside C  
(11.53)

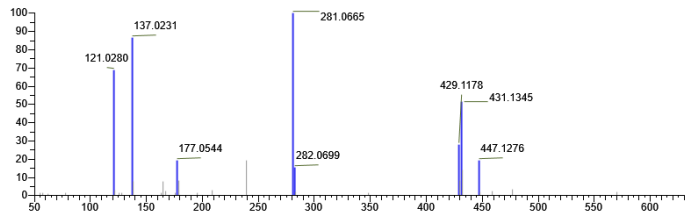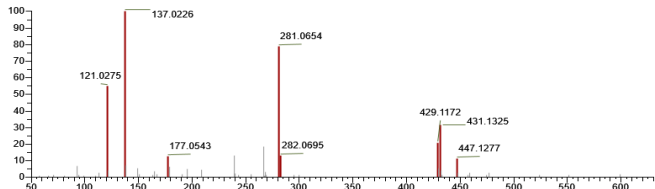

19. Benzoylpaeoniflorin  
(14.13)

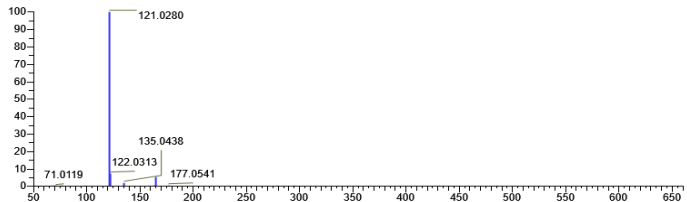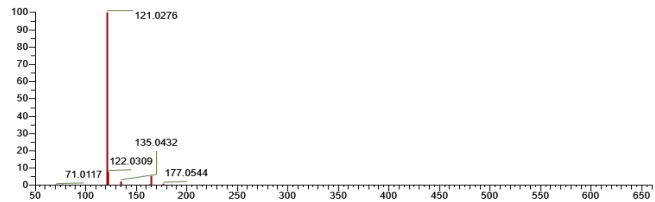

20. Glycyrrhizin  
(17.69)

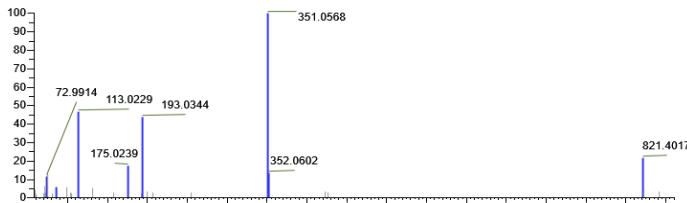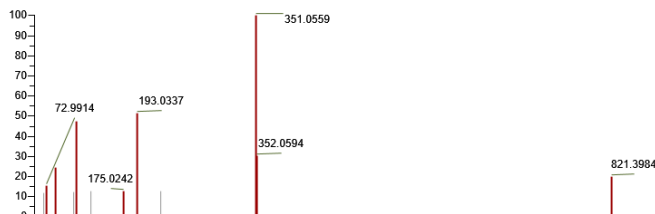

21. Hederagenin  
(20.67)

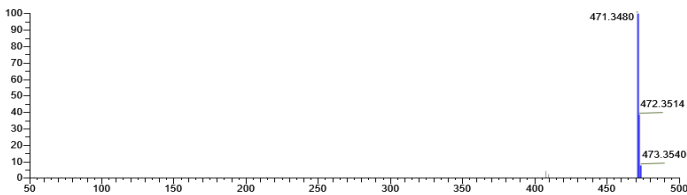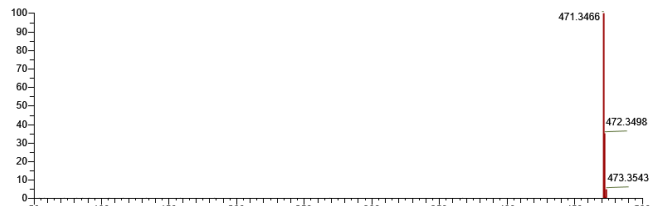

22. Glycyrrhetic acid  
(21.19)

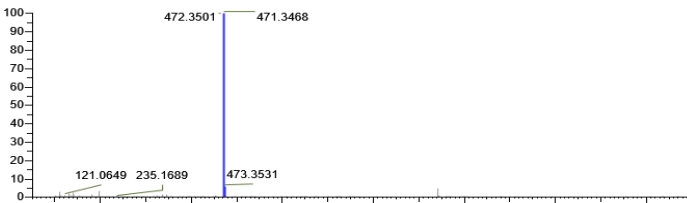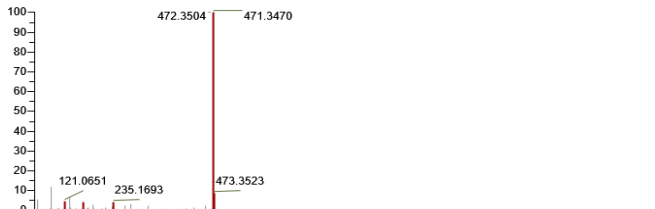

23. 1,2,3,4,6-O-Pentagalloylglucose  
(9.02)

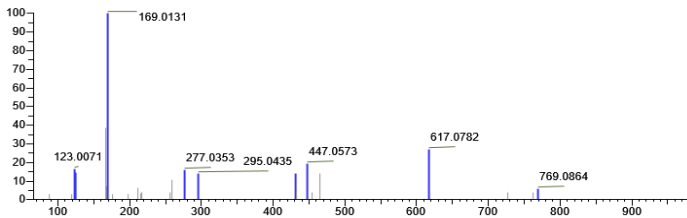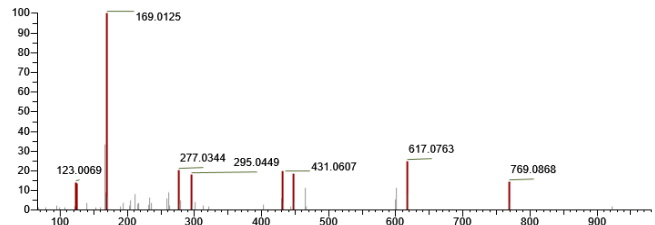

Supplement: s1 [file s1]
